# Supplementary material
Source: PubMed Central journal article supplement (PMC5665850)
Supplement: ajcr0007-2032-f5.pdf [file ajcr0007-2032-f5.pdf]

Combination chemotherapy with FTD/TPI and anti-PD-1 antibody for colorectal cancer

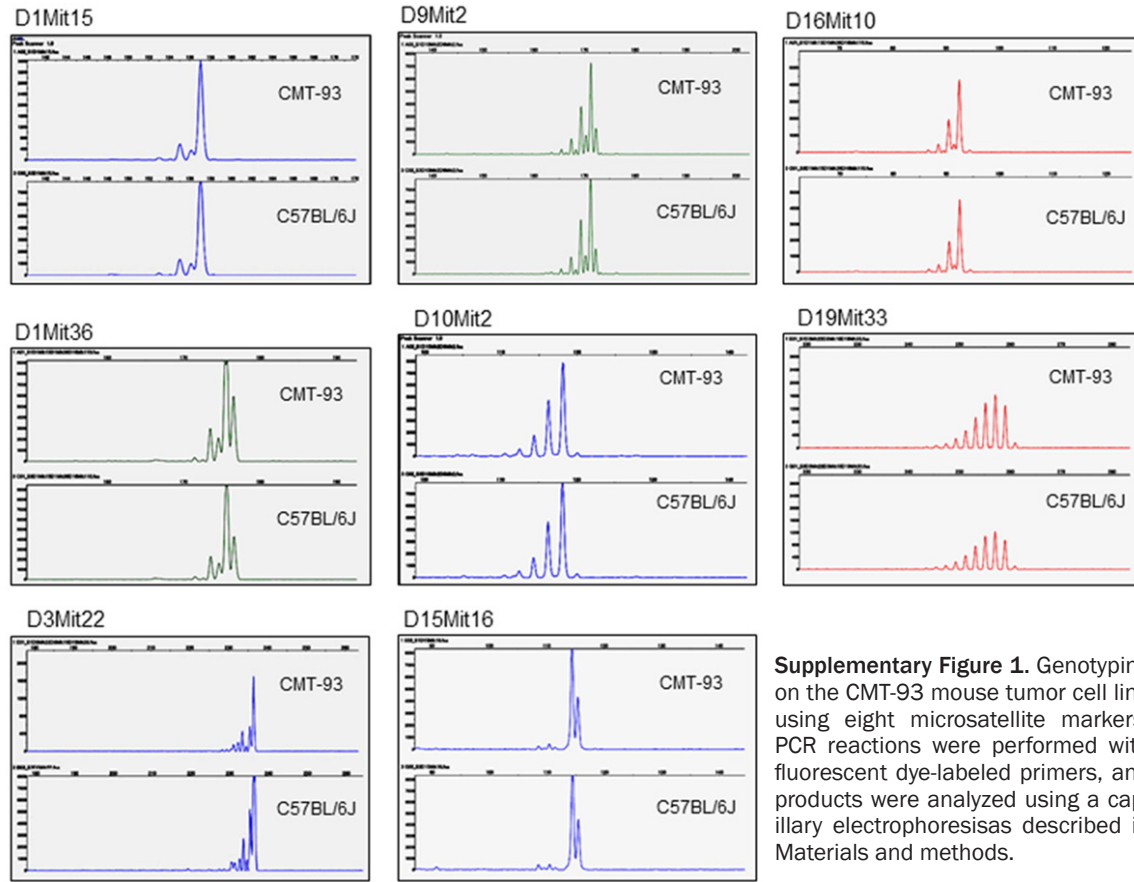

**Supplementary Figure 1.** Genotyping on the CMT-93 mouse tumor cell line using eight microsatellite markers. PCR reactions were performed with fluorescent dye-labeled primers, and products were analyzed using a capillary electrophoresis as described in Materials and methods.

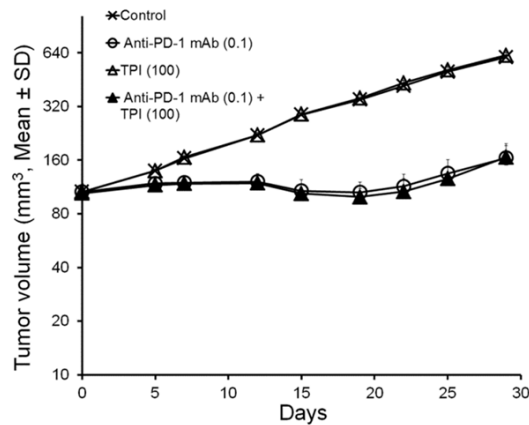

**Supplementary Figure 2.** Effect of anti-mouse PD-1 mAb and TPI combination therapy in mouse colorectal CMT-93 tumors. Anti-mouse PD-1 mAb was administered intraperitoneally on days 1, 5, and 9. TPI was administered orally daily from days 1 to 14. Mice were treated with vehicle (x), anti-mouse PD-1 mAb (0.1 mg, o), TPI (100 mg/kg, Δ), anti-mouse PD-1 mAb (0.1 mg) plus TPI (100 mg/kg) (▲). Values indicate means  $\pm$  SD (n = 6). Tumor volume was measured twice weekly.
